# Supplementary material for: Chemical Modification of Curcumin into Its Semi-Synthetic Analogs Bearing Pyrimidinone Moiety as Anticancer Agents
Source: MDPI journal article supplement (doi:10.3390/plants11202737), 2022-10-16
Supplement: s1 [file s1]

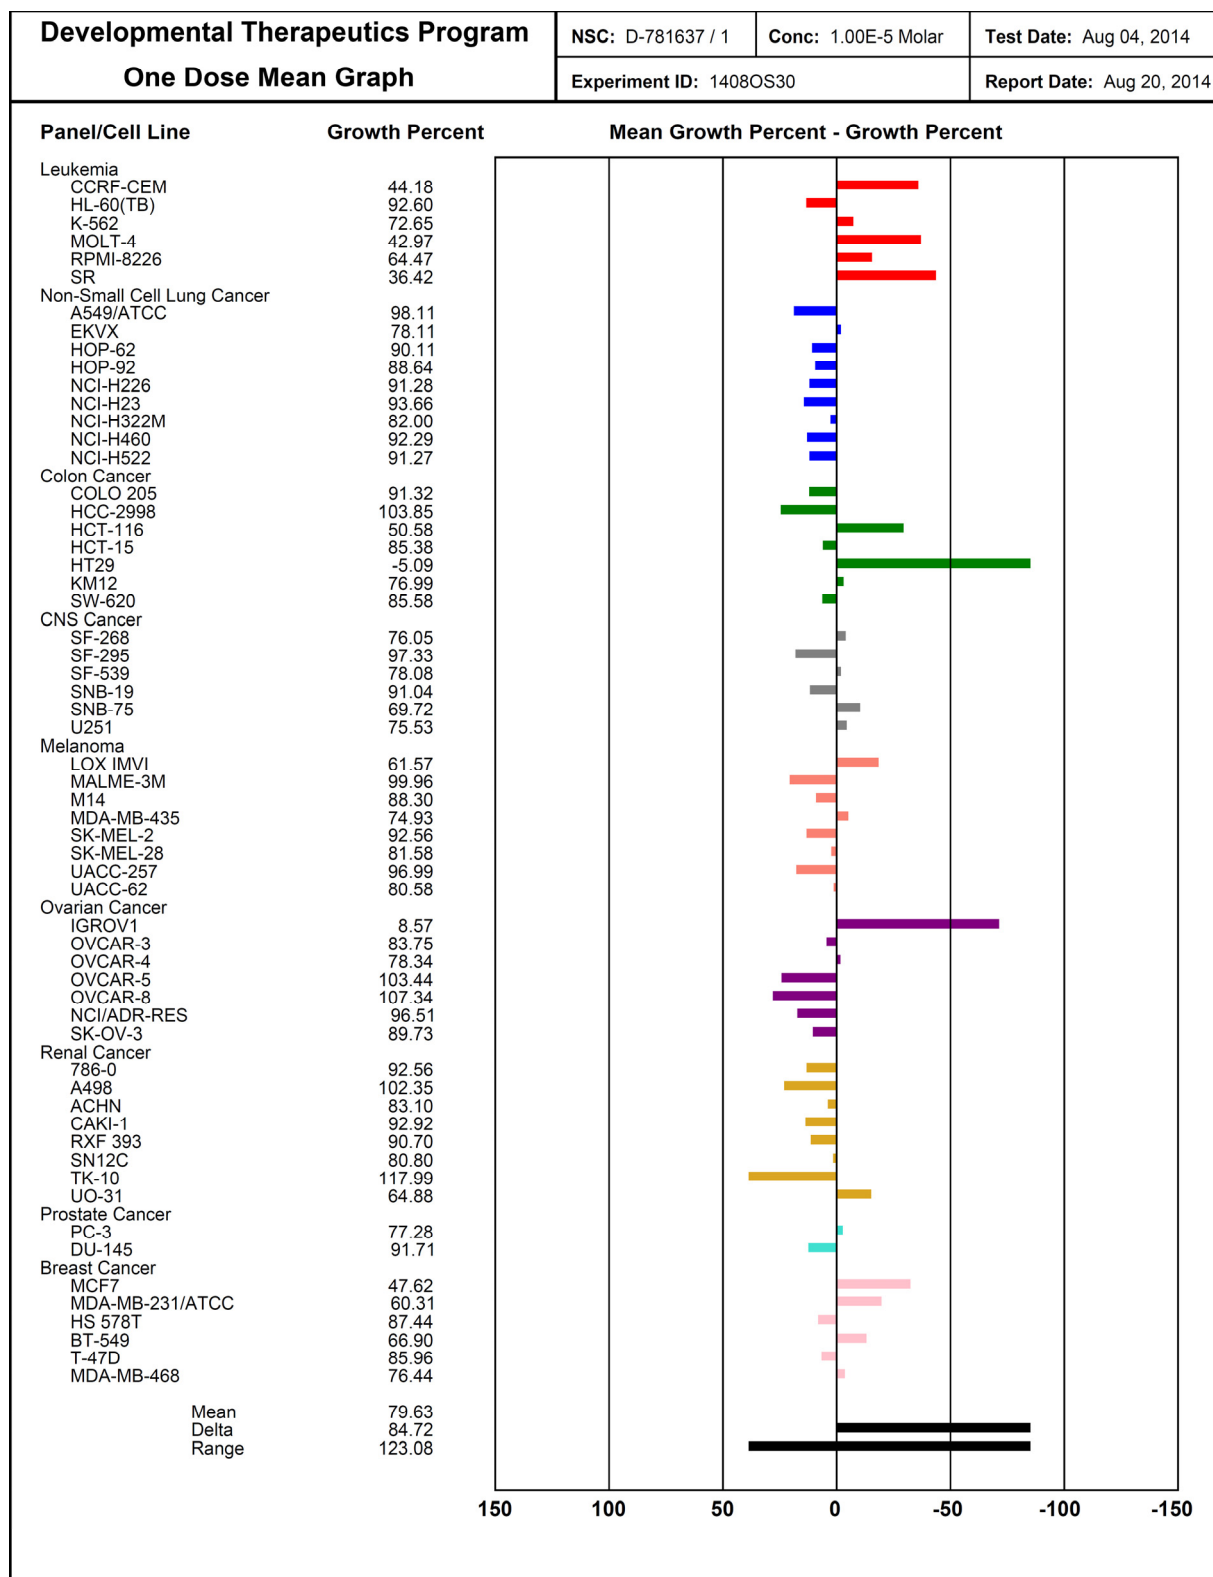

**Figure S1.** Anticancer data of compound C1 against 59 cancer cell lines.

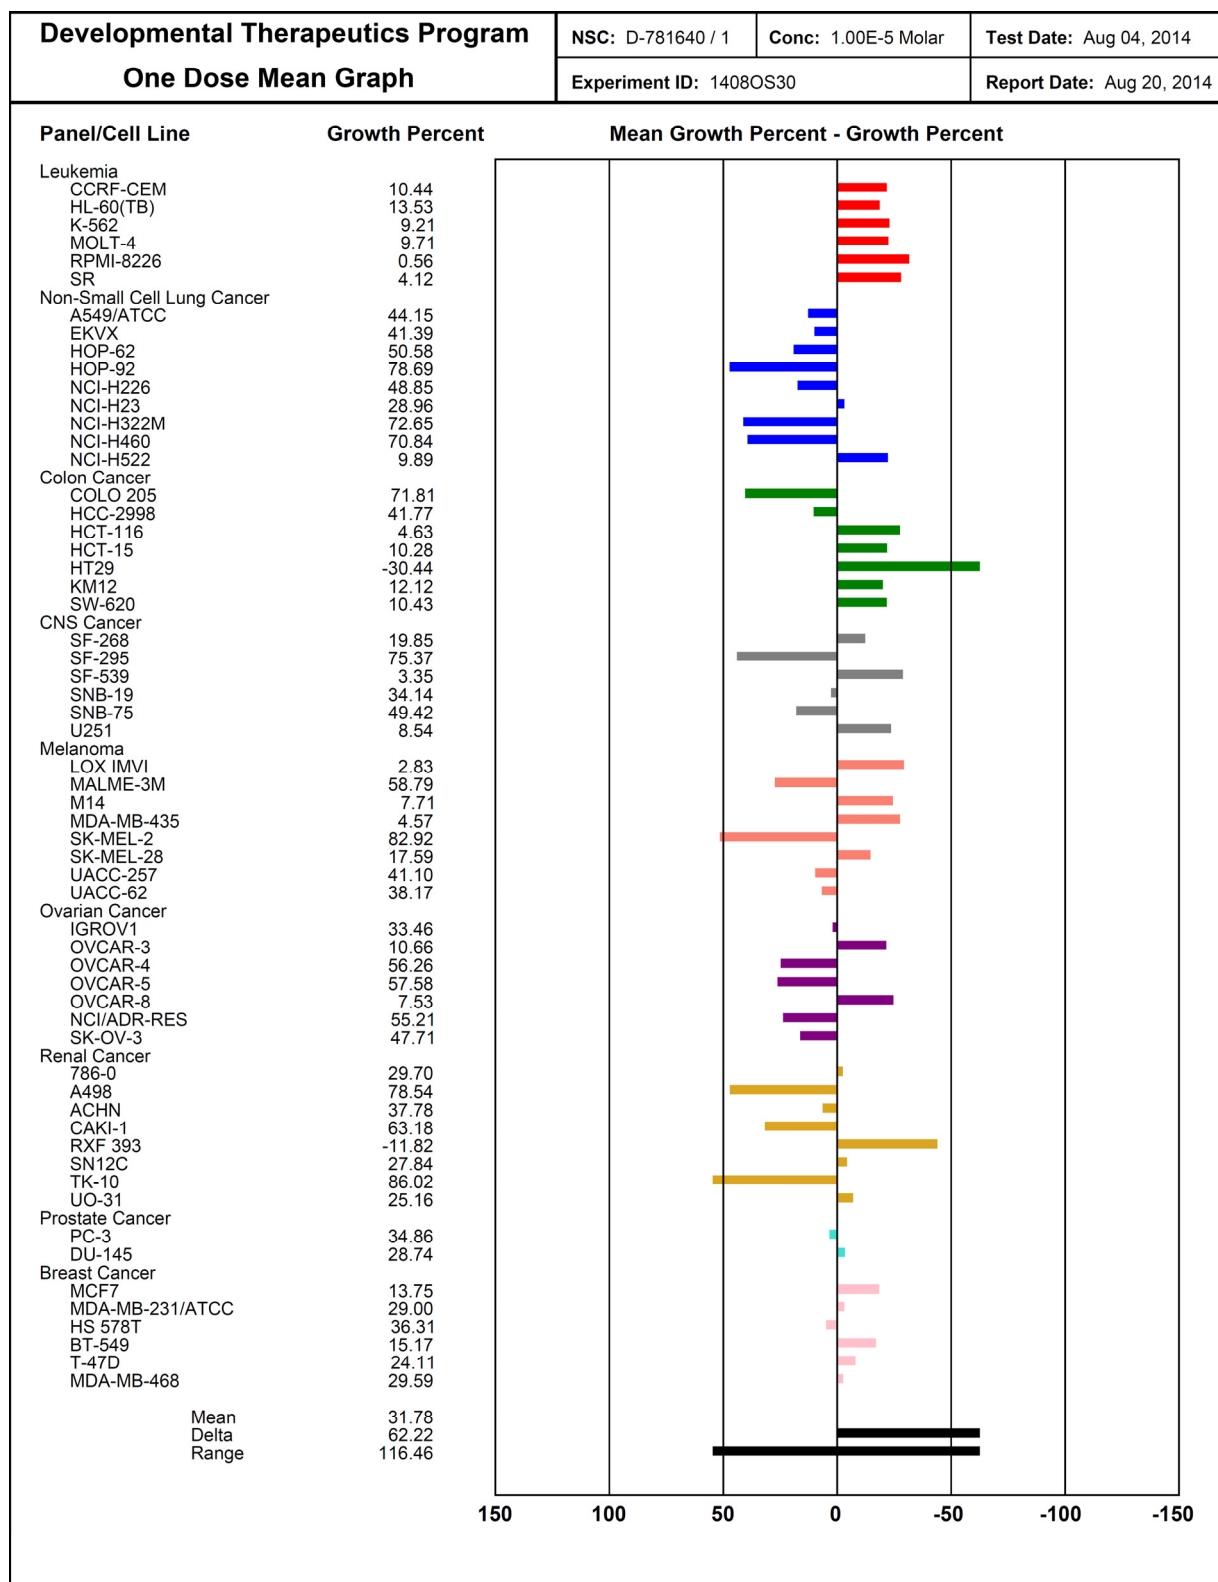

**Figure S2.** Anticancer data of compound C2 against 59 cancer cell lines.

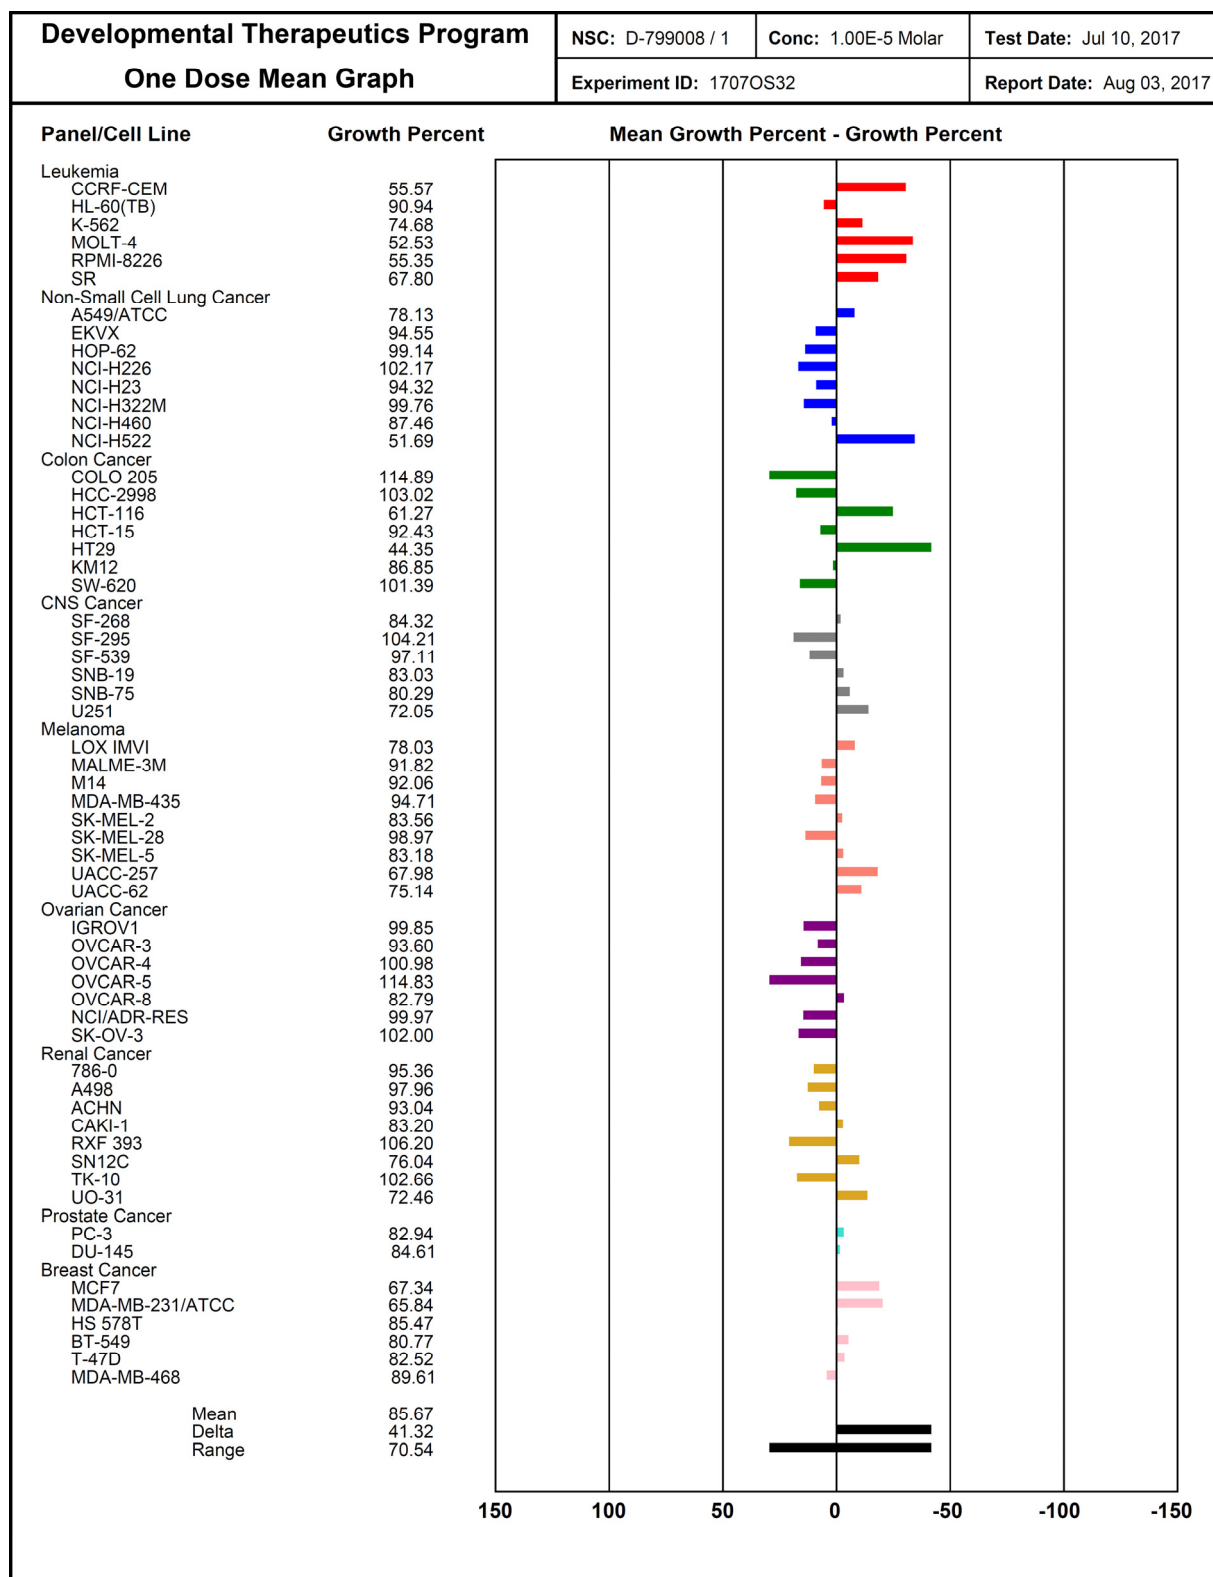

**Figure S3.** Anticancer data of compound **C3** against 59 cancer cell lines.

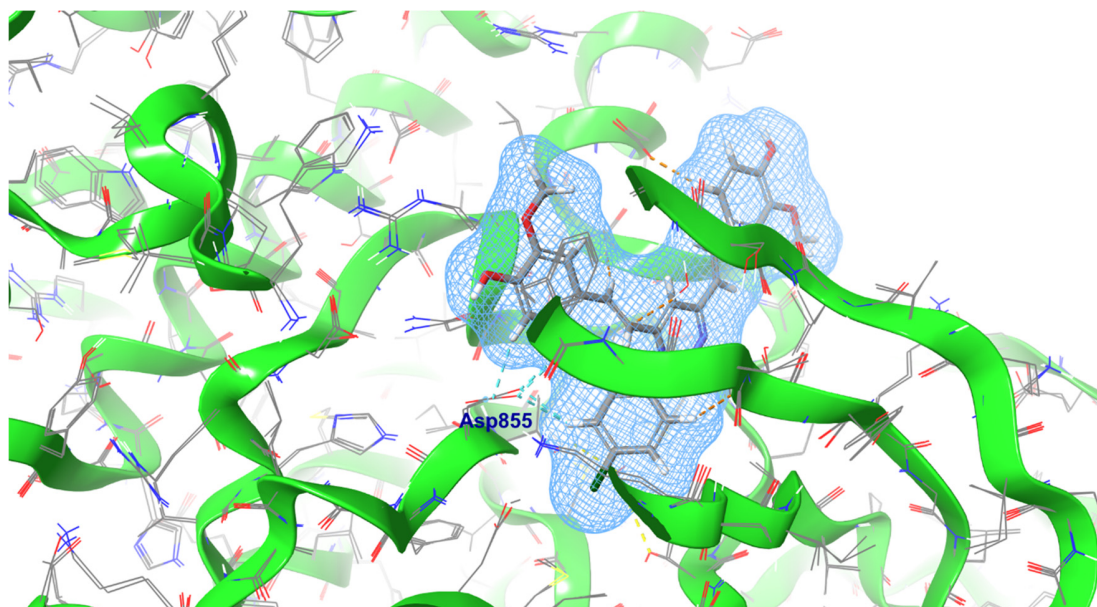

**Figure S4.** 3D Interaction of ligand C1 against the binding site EGFR (binding affinity =  $-5.117$  kcal/mol).
